# Supplementary material
Source: Springer Nature journal article supplement (https://www.springermedizin.de/resource/supplementary/12885_2012_3840_MOESM1_ESM.pdf/9464596)
Supplement: MOESM1 [file 9464596]

## Supplemental Figure 1

### Antibodies Used in These Analyses

| Antibody Name                    | Supplier        | Catalog # | Dilution | Notes                       |
|----------------------------------|-----------------|-----------|----------|-----------------------------|
| actin C-11                       | Santa Cruz      | SC-1615   | 1:2000   |                             |
| activated $\beta$ -catenin (ABC) | Millipore       | 05-665    | 1:500    | Diluted in 1% milk in TBST  |
| axin 1                           | Cell Signaling  | C76H11    | 1:1000   |                             |
| $\beta$ -catenin                 | BD Biosciences  | 610153    | 1:2000   |                             |
| Tankyrase                        | AbCam           | ab13587   | 1:500    | Used to detect murine Tnks1 |
| Tankyrase 1                      | Santa Cruz      | SC-8708-R | 1:1000   | Used to detect human Tnks1  |
| Tankyrase 2                      | Everest Biotech | EB08220   | 1:1000   |                             |

### Real-Time PCR Primers Used in These Analyses

| Name           | Species | Forward Primer (5'-3')   | Reverse Primer (5'-3')   |
|----------------|---------|--------------------------|--------------------------|
| $\beta$ -actin | human   | GCTACGAGCTGCCTGACGG      | GATGGAGTTGAAGGTAGTTTCG   |
| GAPDH          | human   | ATGGGGAAGGTGAAGGTCTG     | GGGGTCATTGATGGCAACAATA   |
| Tnks1          | human   | GCAGTACCACCAGCACAAATC    | AGGGGAGGATGGAGAGGAAG     |
| Tnks2          | human   | ATCTGCTCTGCCCTTTGTTACAA  | GCTAAAATCTACTCCTGGAACCTC |
| Wif1           | human   | GGTCCACGGACCTCACTGT      | AGTCACACAAAGTCCACCATTCA  |
| $\beta$ -actin | mouse   | TTGTCCCCCAACTTGATGT      | GCCCTGGCTGCCTCAAC        |
| GAPDH          | mouse   | AGGTCGGTGTGAACGGATTG     | TGTAGACCATGTAGTTGAGGTCA  |
| Tnks1          | mouse   | GTCTACTCCGTTACACCTGGC    | TGAAGAGGTACAAGTCCACCTTT  |
| Tnks2          | mouse   | CGCCCGAGAAGGTGAACAG      | TTTGCACCGTTCTGAAGAAGAT   |
| Wif1           | mouse   | GATTTCAGGAAAGCCCAACAAGAA | GTTGGATCTGCCATGATGCCTTT  |

### siRNAs Used in These Analyses

| Name    | Gene Target | Species       | Duplex Forward Oligo (5'-3') | Duplex Reverse Oligo (5'-3') |
|---------|-------------|---------------|------------------------------|------------------------------|
| Control | scrambled   | human + mouse | CGUUAUACGCGUAUUAUACGCGUAT    | AUACGCGUAUUAUACGCGAUUAACGAC  |
| Tnks1.1 | Tnks1       | mouse         | GGAUUGUUGAAGACACUUGCUGCAG    | CUGCAGCAAGUGUUCUACAACAUCCUU  |
| Tnks1.3 | Tnks1       | mouse         | GCACGGAGCAAAGAUGAUGCACTG     | CAGUGCAUUCUUCUUGCUCGUGCUU    |
| Tnks2.3 | Tnks2       | mouse         | AGGUUAUUGCUUUGGAUAGUCUUGG    | CCAAGACUAUCCAAGCAUUAACCUUU   |
| Tnks2.5 | Tnks2       | mouse         | CGGAUGUCCAAUUCACAAAGACAGA    | UCUGUCUUUGUGAAUUGGACAUCCGGU  |
| Tnks1.2 | Tnks1       | human         | GGCAAGCAAUUAUGUAGAUUAACA     | UGUUAUCUACAUUUAUUGCUUGCCAU   |
| Tnks1.3 | Tnks1       | human         | GCAUGUUAAGUCCUCUAGUCAUCA     | UGAUGACUAGAGGACUUAACAUGCUG   |
| Tnks2.1 | Tnks2       | human         | AGCUCAUUAUGAUGUUGUUGAAGTA    | UACUUAACAACAUCUUAUUGAGCUUU   |
| Tnks2.2 | Tnks2       | human         | GGAACAUAAUGAUGAUGUUAUAUTT    | AAAUGUAACAUCUUAUUGUUCUUA     |

### shRNAs Used in These Analyses

| Name                  | Gene Target  | Backbone                         | TRC Identifier | Notes                                                         |
|-----------------------|--------------|----------------------------------|----------------|---------------------------------------------------------------|
| pLKO.1-CMV-Neo shCTRL | scrambled    | pLKO.1-CMV-Neo (G418 selectable) | n/a            | Scrambled sequence from SHC202 custom-cloned by Sigma Aldrich |
| Tnks1.2               | murine Tnks1 | pLKO.1-CMV-Neo (G418 selectable) | TRCN0000238900 | custom-cloned by Sigma Aldrich                                |
| Tnks1.3               | murine Tnks1 | pLKO.1-CMV-Neo (G418 selectable) | TRCN0000238901 | custom-cloned by Sigma Aldrich                                |
| TRC2 shCTRL           | scrambled    | TRC2 (puromycin selectable)      | n/a            | Sigma product SHC202                                          |
| Tnks2.1               | murine Tnks2 | TRC2 (puromycin selectable)      | TRCN0000111416 |                                                               |
| Tnks2.3               | murine Tnks2 | TRC2 (puromycin selectable)      | TRCN0000111418 |                                                               |
